# An epigenetic clock in an insect model system

Kristiana Brink<sup>1†</sup>, Christian Thomas<sup>1†</sup>, Alun Jones<sup>2</sup>  
and Eamonn Mallon<sup>1\*</sup>

<sup>1</sup>Genetics and Genome Biology, University of Leicester,  
University Road, Leicester, LE1 7RH, United Kingdom.

<sup>2</sup> Institute for Evolution and Biodiversity, University of  
Muenster, Huefferstrabe, Munster, 48149, Germany.

\*Corresponding author(s). E-mail(s): [ebm3@le.ac.uk](mailto:ebm3@le.ac.uk);

Contributing authors: [keb40@leicester.ac.uk](mailto:keb40@leicester.ac.uk);

[clt54@leicester.ac.uk](mailto:clt54@leicester.ac.uk); [ajones@uni-muenster.de](mailto:ajones@uni-muenster.de);

†These authors contributed equally to this work.

## Abstract

Epigenetic clocks in humans are argued to be a measure of true biological age based on the DNA methylation status of selected sites in the genome. Here we discover for the first time, an epigenetic clock in a model insect system, *Nasonia vitripennis*. By leveraging the power of an insect model, future studies will be able to research the biology underpinning epigenetic clocks and how influenced epigenetic clocks are by ageing interventions.

An epigenetic clock is an emergent property of the DNA methylation status of a large number of genes, the epigenome, calculated using supervised machine learning methods. There is evidence epigenetic age mirrors true biological age and its associated morbidity and mortality better than chronological age [1]. However, their utility as measures of changes in biological age for clinical interventions is limited as their mechanistic basis is not understood [2].

Ageing is a complex process influenced by many environmental and genetic components. The effects of these components influence each other making them difficult to investigate, especially in complex mammalian models. Therefore, a large body of ageing research is based on simple invertebrate model organisms [3, 4]. Advantages include easy and cheap to keep in a laboratory, short life span, genetic and molecular tools available and a sequenced genome. However,

2 *An epigenetic clock in an insect model system*

047 the current invertebrate models of ageing (*Drosophila* [5] and *C. elegans* [6])  
 048 do not possess detectable DNA methylation, reducing their generality.

049 The jewel wasp, *Nasonia vitripennis*, an emerging model system [7] has a  
 050 functional methylation system [8] making it an ideal system to investigate the  
 051 epigenetics of ageing. We therefore measured chronological ageing and changes  
 052 in the epigenome using whole genome bisulfite sequencing (WGBS) in order  
 053 to discover if *Nasonia vitripennis* possessed an epigenetic clock.

054 Males and females showed different patterns of life expectancy (Cox mixed-  
 055 effects model: Hazard ratio for females = 2.48 (standard error of coefficient =  
 056 0.233),  $z = 3.89$ ,  $p = 9.8 \times 10^{-5}$ ), with females' mean life expectancy being  
 057 29 days and males' being 17 days, see Figure 1a. This was a greater than the  
 058 16.6 days for females and 10.7 days for males previously found for sucrose-  
 059 fed individuals [9]. Time points 0, 8 and 16 days were selected for the WGBS  
 060 experiment.

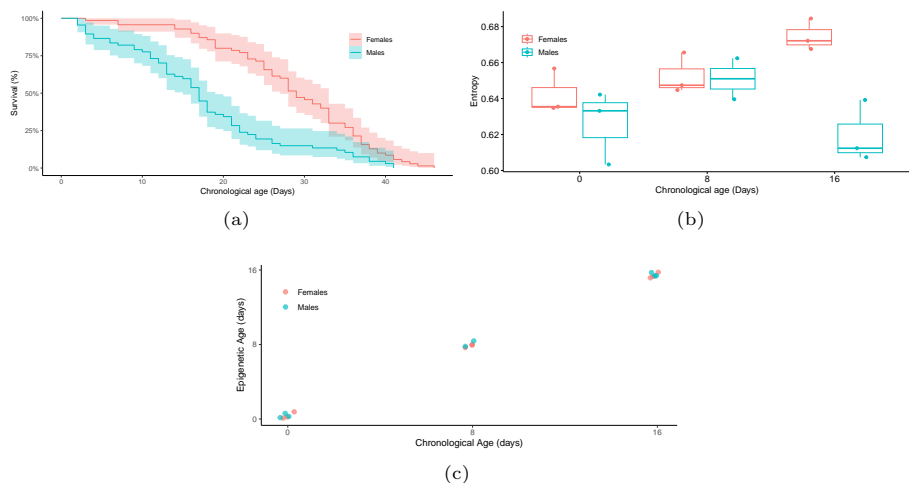

078 **Fig. 1:** (a) Kaplan-Meier survival curves for female ( $n = 70$ ) and male ( $n = 67$ ) *Nasonia vitripennis* adults. Shaded areas represent the 95% confidence  
 079 intervals. (b) Boxplots of epigenetic entropy based on the 5290 age related  
 080 differentially methylated CpGs over time for male and female *Nasonia*. Each  
 081 point is a single WGBS library made up of ten individuals. (c) Scatterplot of  
 082 epigenetic age versus chronological age of male ( $n=8$ ) and female ( $n=9$ ) *Naso-*  
 083 *nia* samples. Each sample is made up of the whole bodies of ten individuals.

084  
085  
086  
087  
088  
089  
090  
091  
092

5290 CpGs were found to be significantly differentially methylated between at least two time points in males or females. Of these 48% were hypomethylated and 52% hypermethylated. We used these 5290 CpGs as the basis of two measures of the ageing epigenome; epigenetic drift and the epigenetic clock.

Epigenetic drift is the increased variability in the epigenome found through the course of an individual's life caused by the accumulation of mistakes in preserving epigenetic patterns. Epigenetic drift leads to a decrease in the body's ability to maintain homeostasis [10]. This can be measured as Shannon's entropy, i.e. the loss of information in the epigenome over time [11]. Entropy is calculated as;

$$Entropy = \frac{1}{N * \log \frac{1}{2}} \sum_i [MF_i * \log MF_i + (1 - MF_i) * (1 - \log MF_i)] \quad (1)$$

with  $MF_i$  the fraction of methylation on a given CpG and N the total number of CpGs measured (5290).

An increase in entropy means the epigenome is becoming less predictable, that is more variable over time. There was a significant interaction of chronological age and sex on their effects on epigenetic entropy (Beta regression:  $\chi^2 = 15.3192$ , d.f. = 2,  $p = 0.00047$ ), see Figure 1b. Females display the increasing pattern found in other species ( $F = 6.021$ ,  $df = 2$ ,  $p = 0.0024$ ), but males display a more complicated pattern with at first an increase at day eight followed by a decrease at day sixteen ( $F = 4.432$ ,  $df = 2$ ,  $p = 0.0119$ ). This seems to be reflected in the survivorship curve (Figure 1a), where males have shorter life spans, but the rate of death seems to slow down once males go past median lifespan. This slower rate of death might be associated with this decreased entropy in sixteen day old males.

The epigenetic clock was constructed by regressing chronological age against the 5290 significantly differentially methylated CpGs. This identified 19 CpGs that best predict age. Eight of these decrease in methylation as *Nasonia* age and eleven increase in methylation. The full list of these CpGs and the genes where they are located can be found in supplemental table 1. Of passing note, the CpG having the most effect on epigenetic age in this model is located in the gene for a leucine-rich repeat kinase (*lrrk*). LRRK2 mutations are a common cause of age related autosomal-dominant Parkinson's disease [12].

The epigenetic age of each replicate is the weighted average of these CpGs' methylation state. This correlates with chronological age (Spearman's  $\rho = 0.94$ ,  $p = 1.4 \times 10^{-8}$ ), see Figure 1c. This is similar to results in many vertebrates [13] and even recently in the water flea *Daphnia* [14]. However, this is the first time an epigenetic clock has been discovered in a tractable insect model.

We predict two main areas where our establishment of an epigenetic clock in a model insect species will be useful; firstly, the biology underpinning epigenetic clocks and secondly, how influenced epigenetic clocks are by ageing interventions.

Variation in the rate of an individual's epigenetic clock is affected by a large number of traits including inflammation, cell division, metabolic effects, cellular heterogeneity, diet, and numerous other lifestyle factors [15]. *Nasonia*, with its simplified insect systems, is perfect to experimentally separate

139 the different processes involved in the biology of the clock into its constitu-  
140 tive parts [7]. As an example, we propose larval diapause as a model for early  
141 life experience effects on ageing. Early life effects are a major predictor of  
142 lifespan [16]. Diapause is an overwintering stage in some insects where devel-  
143 opment is arrested. Diapause can increase adult lifespan in insects [17] and is  
144 therefore an example of senescence plasticity, a polyphenism that alters the  
145 ageing of an organism [18]. Using published RNA-seq datasets [19], we found  
146 an increase in the expression of DNMT1a (the enzyme responsible for DNA  
147 methylation maintenance) and a decrease in TET (the enzyme that removes  
148 methylation) in diapaused versus non-diapaused larvae (see Supplementary  
149 Figure 1). This suggests a maintenance of DNA methylation during diapause.  
150 By comparing the rate of the epigenetic clock in adults from diapaused lar-  
151 vae compared to their non-diapaused conspecifics, we could elucidate how the  
152 early life environment affects adult epigenetic ageing.

153 Being short-lived (3-4 weeks as opposed to 26-30 months for mice), *Nasonia*  
154 are ideal to measure the effects of ageing interventions on both life span and  
155 epigenetic ageing. This will answer the question does a short-term decrease in  
156 someone's epigenetic clock score lower their chance of developing age-related  
157 ill health, that is if epigenetic clocks can be used as endpoints for clinical trials  
158 of various anti-ageing interventions [2].

159 Starting with Medawar, genetic mutations were seen as the driver of ageing  
160 [20]. Recent theories on the causes of ageing focus rather on the loss of epi-  
161 genetic information as the main driver of ageing [21]. These epigenetic factors  
162 due to their known plasticity, are tempting targets for anti-ageing interventions  
163 [22]. We propose *Nasonia vitripennis*, with its fully functional DNA methy-  
164 lation system and its now established epigenetic clock as a model for this  
165 epigenetic era of ageing research.

## 166 **Online methods.**

167  
168 **Life span.** *Nasonia* were of the *Nasonia vitripennis* species from the  
169 Leicester strain which has been kept for over 4 years and originated from the  
170 AsymC strain. Wild-type wasps were maintained at 25°C, 40% humidity in a  
171 12-h dark/light cycle. Adults, as soon as they emerged, were placed in tubes of  
172 ten single-sex individuals. They were fed 20% sucrose *ad libitum*. These were  
173 checked every day for survival. 70 females and 67 males were used. A mixed  
174 effect Cox model treating tube as a random effect was implemented using the  
175 survival package (v.3.4) [23] and coxme package (v.2.2) [24] in R 4.2.2 [25].

176 **DNA extraction.** Wasps were collected within 24 hours of eclosion. Some  
177 females may be mated as were allowed to mix with males for upto the first  
178 fifteen hours after eclosion. Wasps were then collected under light CO<sub>2</sub> anes-  
179 thesia and placed into single-sex vials containing 10 individuals. They were  
180 then provided with filter paper soaked in 20% sucrose which was changed daily.  
181 Day 0 wasps were collected at the end of the first 24 hours after eclosion then  
182 samples on the 8th and 16th day. 60 wasps of each sex were used for each time-  
183 point. 20 wasps from the same sex were pooled for each biological replicate,  
184

creating three biological for each sex at each time point. Wasps were immediately frozen in liquid nitrogen and stored at minus 80°C freezer for sequencing. DNA was extracted using Qiagen's DNeasy Blood and Tissue kit. DNA quality was assessed by NanoDrop 2000 spectrophotometer (Thermo Scientific), 1% agarose gel and Qubit (dsDNA BR Assay, ThermoFisher).

**Whole genome bisulfite sequencing.** WGBS sequencing was carried out by BGI Tech Solution Co., Ltd.(Hong Kong). A 1% unmethylated lambda spike was included in each sample in order to assess bisulfite conversion rates. For WGBS samples, library quality was checked with FastQC (v.0.11.5; 26). Paired-end reads were aligned to the *Nasonia vitripennis* reference genome (Nvit\_PSR1.1, Refseq accession no. GCA\_009193385.1, 27) using the Bowtie 2 aligner (v.2.2.9; 28) within the Bismark software (v.0.18.1; 29) under standard parameters. Samples sequenced across multiple files were merged using samtools (v.1.9; 30). Files were deduplicated using Bismark, and methylation counts were extracted in different contexts using the bismark\_methylation\_extractor command (v.0.18.1; 29). Destranding was carried out using the coverage2cytosine script from Bismark using the merge\_CpG command to increase coverage by pooling the top and bottom strand into a single CpG [29]. Reads were also aligned to the unmethylated lambda reference genome to calculate the error rate of the C-T conversion (Refseq accession no. GCF\_000840245.1).

Output from the coverage2cytosine script was then inputted into the R package methylKit (v.3.14; 31) where files were filtered and normalised based on coverage, removing sites with abnormally high coverage (greater than 99% percentile) or with a coverage less than ten in each sample.

A binomial test was then applied to the filtered CpG sites where the lambda conversion rate was used as the probability of successes and a false discovery rate (FDR) of  $p < 0.05$  [32]. As the majority of sites in the *Nasonia* genome show zero methylation, only CpGs which were methylated in at least one sample were retained. On these CpGs, differential methylation analysis was performed using the calculateDiffMeth command in methylKit, which implements a logistic regress model. Differentially methylated CpG sites were classed as having a minimum difference of  $> 15\%$  methylation and a q-value  $< 0.05$ . Differential methylation analyses were performed across age in each sex as well as a comparatively between sexes over age.

Genes were classed as differentially methylated if they contained at least two differentially methylated CpG and a minimum weighted methylation difference of 15% across the entire feature [33]. Weighted methylation level is classed as the total number of methylated cytosines (C) within a region (i), divided by the total coverage of that region [33].

**Elastic net regression.** Chronological age was regressed against the 5290 age significant CpGs' beta values using an elastic net regression implemented in the glmnet R package [34]. This identified 19 CpGs that predict age. The

228  
229  
230

231 epigenetic age of each replicate is predicted based on these CpGs methyla-  
 232 tion state. This epigenetic age was correlated with chronological age using a  
 233 spearman’s rank correlation.

234 **Supplementary information.**

235 **Supplementary table 1:** The genomic location of the 19 CpGs making up  
 236 the epigenetic clock in *Nasonia vitripennis*.

237 **Supplementary figure 1:** Gene expression of Dmnt1a, Dmnt3 and Tet in  
 238 *Nasonia vitripennis* for both diapaused and non-diapaused larvae. Calculated  
 239 from published data sets [19].  
 240

241 **Acknowledgments.**

242 EBM was funded by grant RPG-2020-363 from the Leverhulme Trust. CT, KB  
 243 and ARCJ was supported by a BBSRC MIBTP DTP studentships.  
 244

245 **References**

- 246
- 247 [1] Seale, K., Horvath, S., Teschendorff, A., Eynon, N. & Voisin, S. Making  
 248 sense of the ageing methylome. *Nature Reviews Genetics* 1–21 (2022).  
 249 URL <https://www.nature.com/articles/s41576-022-00477-6>. <https://doi.org/10.1038/s41576-022-00477-6>, publisher: Nature Publishing Group .  
 250  
 251
- 252 [2] Drew, L. Turning back time with epigenetic clocks. *Nature*  
 253 **601** (7893), S20–S22 (2022). URL <https://www.nature.com/articles/d41586-022-00077-8>.  
 254 <https://doi.org/10.1038/d41586-022-00077-8>,  
 255 bandiera\_abtest: a Cg\_type: Outlook Number: 7893 Publisher: Nature  
 256 Publishing Group Subject\_term: Ageing, Society, Epigenetics .  
 257
- 258 [3] Mack, H. I. D., Heimbucher, T. & Murphy, C. T. The nematode  
 259 *Caenorhabditis elegans* as a model for aging research. *Drug Discovery*  
 260 *Today: Disease Models* **27**, 3–13 (2018). URL <https://www.sciencedirect.com/science/article/pii/S1740675718300343>.  
 261 <https://doi.org/10.1016/j.ddmod.2018.11.001> .  
 262
- 263 [4] Piper, M. D. W. & Partridge, L. *Drosophila* as a model for age-  
 264 ing. *Biochimica et Biophysica Acta (BBA) - Molecular Basis of Disease*  
 265 **1864** (9, Part A), 2707–2717 (2018). URL <https://www.sciencedirect.com/science/article/pii/S0925443917303319>.  
 266 <https://doi.org/10.1016/j.bbadis.2017.09.016> .  
 267  
 268
- 269 [5] Lyko, F. & Maleszka, R. Insects as Innovative Models for Functional  
 270 Studies of DNA Methylation. *Trends in genetics* **27** (4), 127–131 (2011).  
 271 <https://doi.org/10.1016/j.tig.2011.01.003> .  
 272
- 273 [6] Hu, C.-W., Chen, J.-L., Hsu, Y.-W., Yen, C.-C. & Chao, M.-R. Trace anal-  
 274 ysis of methylated and hydroxymethylated cytosines in DNA by isotope-  
 275 dilution LC-MS/MS: first evidence of DNA methylation in *Caenorhabditis*  
 276

- elegans. *The Biochemical Journal* **465** (1), 39–47 (2015). <https://doi.org/10.1042/BJ20140844> . 277  
278  
279
- [7] Werren, J. H. *et al.* Functional and evolutionary insights from the genomes of three parasitoid *Nasonia* species. *Science (New York, N. Y.)* **327** (5963), 343–348 (2010). <https://doi.org/10.1126/science.1178028> . 280  
281  
282  
283
- [8] Wang, X. *et al.* Function and Evolution of DNA Methylation in *Nasonia vitripennis*. *PLoS Genetics* **9** (10), e1003872 (2013). URL <http://journals.plos.org/plosgenetics/article?id=10.1371/journal.pgen.1003872>. <https://doi.org/10.1371/journal.pgen.1003872> . 284  
285  
286  
287  
288
- [9] Floessner, T. S. E. *et al.* Lifespan is unaffected by size and direction of daily phase shifts in *Nasonia*, a hymenopteran insect with strong circadian light resetting. *Journal of Insect Physiology* **117**, 103896 (2019). <https://doi.org/10.1016/j.jinsphys.2019.103896> . 289  
290  
291  
292
- [10] Vaiserman, A. Developmental Tuning of Epigenetic Clock. *Frontiers in Genetics* **9** (2018). URL <https://www.frontiersin.org/articles/10.3389/fgene.2018.00584> . 293  
294  
295  
296
- [11] Hannum, G. *et al.* Genome-wide Methylation Profiles Reveal Quantitative Views of Human Aging Rates. *Molecular Cell* **49** (2), 359–367 (2013). URL <https://www.sciencedirect.com/science/article/pii/S1097276512008933>. <https://doi.org/10.1016/j.molcel.2012.10.016> . 297  
298  
299  
300  
301
- [12] Chen, J., Chen, Y. & Pu, J. Leucine-Rich Repeat Kinase 2 in Parkinson’s Disease: Updated from Pathogenesis to Potential Therapeutic Target. *European Neurology* **79** (5-6), 256–265 (2018). URL <https://www.karger.com/Article/FullText/488938>. <https://doi.org/10.1159/000488938>, publisher: Karger Publishers . 302  
303  
304  
305  
306  
307
- [13] Parrott, B. B. & Bertucci, E. M. Epigenetic Aging Clocks in Ecology and Evolution. *Trends in Ecology & Evolution* **34** (9), 767–770 (2019). <https://doi.org/10.1016/j.tree.2019.06.008> . 308  
309  
310  
311
- [14] Hearn, J., Plenderleith, F. & Little, T. J. DNA methylation differs extensively between strains of the same geographical origin and changes with age in *Daphnia magna*. *Epigenetics & Chromatin* **14** (1), 4 (2021). URL <https://doi.org/10.1186/s13072-020-00379-z>. <https://doi.org/10.1186/s13072-020-00379-z> . 312  
313  
314  
315  
316  
317
- [15] Bell, C. G. *et al.* DNA methylation aging clocks: challenges and recommendations. *Genome Biology* **20** (1), 249 (2019). URL <https://doi.org/10.1186/s13059-019-1824-y>. <https://doi.org/10.1186/s13059-019-1824-y> . 318  
319  
320  
321  
322

- 323 [16] Jagust, W. J. Early life sets the stage for aging. *Proceedings of the*  
 324 *National Academy of Sciences* **113** (33), 9148–9150 (2016). URL [https://](https://www.pnas.org/doi/10.1073/pnas.1609720113)  
 325 [www.pnas.org/doi/10.1073/pnas.1609720113](https://www.pnas.org/doi/10.1073/pnas.1609720113). [https://doi.org/10.1073/](https://doi.org/10.1073/pnas.1609720113)  
 326 [pnas.1609720113](https://doi.org/10.1073/pnas.1609720113), publisher: Proceedings of the National Academy of  
 327 Sciences .  
 328
- 329 [17] Denlinger, D. L. Why study diapause? *Entomological Research* **38** (1),  
 330 1–9 (2008). URL [https://onlinelibrary.wiley.com/doi/abs/10.1111/](https://onlinelibrary.wiley.com/doi/abs/10.1111/j.1748-5967.2008.00139.x)  
 331 [j.1748-5967.2008.00139.x](https://onlinelibrary.wiley.com/doi/abs/10.1111/j.1748-5967.2008.00139.x). [https://doi.org/10.1111/j.1748-](https://doi.org/10.1111/j.1748-5967.2008.00139.x)  
 332 [5967.2008.00139.x](https://doi.org/10.1111/j.1748-5967.2008.00139.x), eprint: [https://onlinelibrary.wiley.com/doi/pdf/10.1111/j.1748-](https://onlinelibrary.wiley.com/doi/pdf/10.1111/j.1748-5967.2008.00139.x)  
 333 [5967.2008.00139.x](https://onlinelibrary.wiley.com/doi/pdf/10.1111/j.1748-5967.2008.00139.x) .  
 334
- 335 [18] Flatt, T., Amdam, G. V., Kirkwood, T. B. L. & Omholt, S. W. Life-  
 336 History Evolution and the Polyphenic Regulation of Somatic Maintenance  
 337 and Survival. *The Quarterly Review of Biology* (2015). URL [https://](https://www.journals.uchicago.edu/doi/epdf/10.1086/671484)  
 338 [www.journals.uchicago.edu/doi/epdf/10.1086/671484](https://www.journals.uchicago.edu/doi/epdf/10.1086/671484). [https://doi.org/](https://doi.org/10.1086/671484)  
 339 [10.1086/671484](https://doi.org/10.1086/671484), publisher: The University of Chicago Press .  
 340
- 341 [19] Dittmer, J. & Brucker, R. M. When your host shuts down: larval diapause  
 342 impacts host-microbiome interactions in *Nasonia vitripennis*. *Microbiome*  
 343 **9** (1), 85 (2021). URL <https://doi.org/10.1186/s40168-021-01037-6>.  
 344 <https://doi.org/10.1186/s40168-021-01037-6> .  
 345
- 346 [20] Szilard, L. On the nature of the aging process. *Proceedings of the National*  
 347 *Academy of Sciences* **45** (1), 30–45 (1959). URL [https://www.pnas.](https://www.pnas.org/doi/abs/10.1073/pnas.45.1.30)  
 348 [org/doi/abs/10.1073/pnas.45.1.30](https://www.pnas.org/doi/abs/10.1073/pnas.45.1.30). <https://doi.org/10.1073/pnas.45.1.30>,  
 349 publisher: Proceedings of the National Academy of Sciences .  
 350
- 351 [21] Yang, J.-H. *et al.* Loss of epigenetic information as a cause of mam-  
 352 malian aging. *Cell* **186**, 1–22 (2023). URL [https://www.cell.com/cell/](https://www.cell.com/cell/abstract/S0092-8674(22)01570-7)  
 353 [abstract/S0092-8674\(22\)01570-7](https://www.cell.com/cell/abstract/S0092-8674(22)01570-7). [https://doi.org/10.1016/j.cell.2022.12.](https://doi.org/10.1016/j.cell.2022.12.027)  
 354 [027](https://doi.org/10.1016/j.cell.2022.12.027), publisher: Elsevier .  
 355
- 356 [22] Gensous, N. *et al.* The Impact of Caloric Restriction on the Epige-  
 357 netic Signatures of Aging. *International Journal of Molecular Sciences*  
 358 **20** (8), 2022 (2019). URL [https://www.ncbi.nlm.nih.gov/pmc/articles/](https://www.ncbi.nlm.nih.gov/pmc/articles/PMC6515465/)  
 359 [PMC6515465/](https://www.ncbi.nlm.nih.gov/pmc/articles/PMC6515465/). <https://doi.org/10.3390/ijms20082022> .  
 360
- 361 [23] Therneau, T. M. A package for survival analysis in R. manual (2022).  
 362 URL <https://CRAN.R-project.org/package=survival>.  
 363
- 364 [24] Therneau, T. M. coxme: Mixed effects cox models. manual (2022). URL  
 365 <https://CRAN.R-project.org/package=coxme>.  
 366
- 367 [25] R Core Team. R: A language and environment for statistical comput-  
 368 ing. manual, Vienna, Austria (2021). URL <https://www.R-project.org/>.  
 Text.organization: R Foundation for Statistical Computing.



- [26] Andrews, S. FastQC: a quality control tool for high throughput sequence data (2010). URL <http://www.bioinformatics.babraham.ac.uk/projects/fastqc>. 369  
370  
371  
372
- [27] Sadd, B. M. *et al.* The genomes of two key bumblebee species with primitive eusocial organization. *Genome Biology* **16**, 76 (2015). 373  
374  
URL <https://doi.org/10.1186/s13059-015-0623-3>. <https://doi.org/10.1186/s13059-015-0623-3>. 375  
376  
377
- [28] Langmead, B. & Salzberg, S. L. Fast gapped-read alignment with Bowtie 2. *Nature methods* **9** (4), 357–359 (2012). URL <https://www.ncbi.nlm.nih.gov/pmc/articles/PMC3322381/>. <https://doi.org/10.1038/nmeth.1923>. 378  
379  
380  
381
- [29] Krueger, F. & Andrews, S. R. Bismark: a flexible aligner and methylation caller for Bisulfite-Seq applications. *Bioinformatics* **27** (11), 1571–1572 (2011). URL <https://academic.oup.com/bioinformatics/article/27/11/1571/216956>. <https://doi.org/10.1093/bioinformatics/btr167>. 382  
383  
384  
385
- [30] Li, H. *et al.* The Sequence Alignment/Map format and SAMtools. *Bioinformatics (Oxford, England)* **25** (16), 2078–2079 (2009). <https://doi.org/10.1093/bioinformatics/btp352>. 386  
387  
388  
389
- [31] Akalin, A. *et al.* methylKit: a comprehensive R package for the analysis of genome-wide DNA methylation profiles. *Genome Biology* **13** (10), R87 (2012). <https://doi.org/10.1186/gb-2012-13-10-r87>. 390  
391  
392  
393
- [32] Cheng, L. & Zhu, Y. A classification approach for DNA methylation profiling with bisulfite next-generation sequencing data. *Bioinformatics (Oxford, England)* **30** (2), 172–179 (2014). <https://doi.org/10.1093/bioinformatics/btt674>. 394  
395  
396  
397  
398
- [33] Schultz, M. D., Schmitz, R. J. & Ecker, J. R. ‘Leveling’ the playing field for analyses of single-base resolution DNA methylomes. *Trends in genetics : TIG* **28** (12), 583–585 (2012). URL <https://www.ncbi.nlm.nih.gov/pmc/articles/PMC3523709/>. <https://doi.org/10.1016/j.tig.2012.10.012>. 399  
400  
401  
402  
403
- [34] Friedman, J., Hastie, T. & Tibshirani, R. Regularization paths for generalized linear models via coordinate descent. *Journal of Statistical Software* **33** (1), 1–22 (2010). URL <https://www.jstatsoft.org/v33/i01/>. <https://doi.org/10.18637/jss.v033.i01>. 404  
405  
406  
407  
408  
409  
410  
411  
412  
413  
414
